# Supplementary material
Source: Elsevier journal article supplement (https://www.sciencedirect.com/science/article/pii/S2341287921001551)

**Tabla X*.*** **Métodos de diagnóstico invasivo (requieren la realización de endoscopia) utilizados para detectar la infección por *H. pylori.***

| **Método** | **Fundamento** | **Ventajas** | **Limitaciones** |
| --- | --- | --- | --- |
| **Cultivo** | La bacteria se puede cultivar en medios de agar sólidos selectivos o no selectivos | Permite realizar la identificación definitiva de la bacteria y el antibiograma | Negativo por perdida de viabilidad |
| **Tinción de Gram** | Con esta tinción se tiñen como bacilos Gram negativas con morfología curvada | Técnica muy barata y disponible en todos los laboratorios de microbiología | Presenta baja sensibilidad |
| **Histología** | Permite observar bacilos curvados compatibles con *H. pylori* y además observa la patología asociada | Imprescindible para detectar la patología digestiva asociada a la infección |  |
| **Prueba rápida de la ureasa** | *H. pylori* presenta una potente ureasa que es capaz de degradar la urea. El medio incluye un indicador de pH que hace que el medio adquiera color rosa al hidrolizarse la urea | Se puede realizar en la propia sala de endoscopias detectando el cambio de color en los primeros 30min | Otras bacterias pueden hidrolizar la urea sobre todo si la lectura se realiza después del tiempo recomendado |
| **PCR (Polymerase Chain Reaction)** | Técnica que permite amplificar genes específicos de *H. pylori* pero también genes de resistencia a antibióticos | Diferentes kits comerciales para detectar la bacteria y su resistencia a claritromicina y levofloxacino, aunque haya perdido viabilidad | No está disponible en muchos laboratorios |
| **FISH (Fluorescence *In situ* Hybridization)** | Técnica que utiliza sondas fluorescentes para detectar *H. pylori* y su resistencia a claritromicina en las extensiones de biopsia | Muy sensible y específica para detectar *H. pylori* y permite también detectar formas cocoides, además de resistencia a claritromicina | Requiere experiencia del personal, es menos sensible que la PCR y no está disponible en muchos laboratorios |

**Tabla Y*.*** **Métodos de diagnóstico no invasivos utilizados para detectar la infección por *Helicobacter pylori.***

| **Método** | **Fundamento** | **Ventajas** | **Limitaciones** |
| --- | --- | --- | --- |
| **Prueba del aliento** | El paciente ingiere urea marcada con 13C. Si *H. pylori* se encuentra en el estómago, será degradada por la ureasa liberando 13CO2 | Alta sensibilidad y especificidad | Falsos positivos en niños < 6 años. |
| **Serología** | Detecta la presencia de anticuerpos producidos por el paciente si ha estado en contacto con la bacteria | Útil para estudios epidemiológicos | No permite detectar infección activa ni sirve como seguimiento del tratamiento |
| **Detección de Antígeno en heces por Enzimoinmuno ensayo (EIA) o inmunoensayo quimioluminiscente (CLIA)** | Si en las heces se ha liberado antígeno de *H. pylori* reaccionará con el anticuerpo monoclonal presente en el kit | La sensibilidad y especificidad de los EIA basados en anticuerpos monoclonales son comparables a la prueba del aliento. |  |
| **Detección de Antígeno en heces por inmunocromatografía (ICT)** | Si en las heces se ha liberado antígeno de *H. pylori* reaccionará con el anticuerpo monoclonal presente en el dispositivo | Se puede hacer en cada muestra individual | Suelen presentar buena especificidad, pero baja sensibilidad |

***Figura Z***. Diario de seguimiento del tratamiento erradicador (tomado de www.espghan.org)


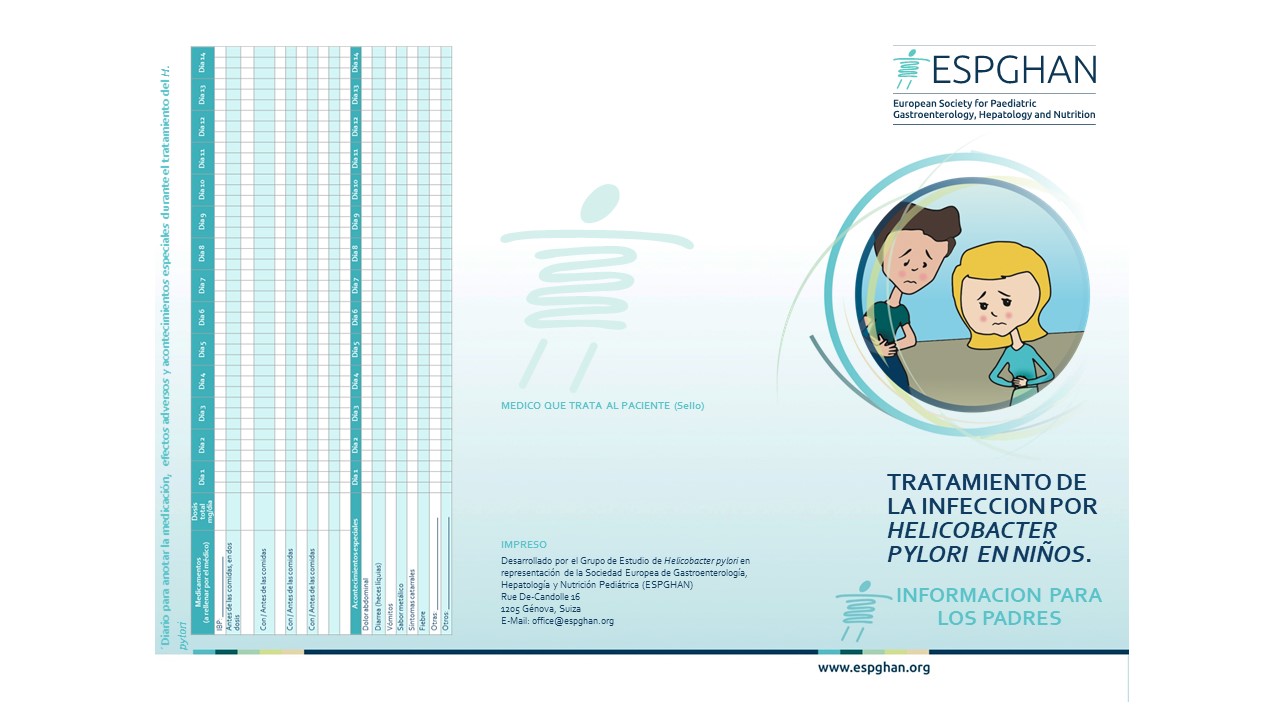


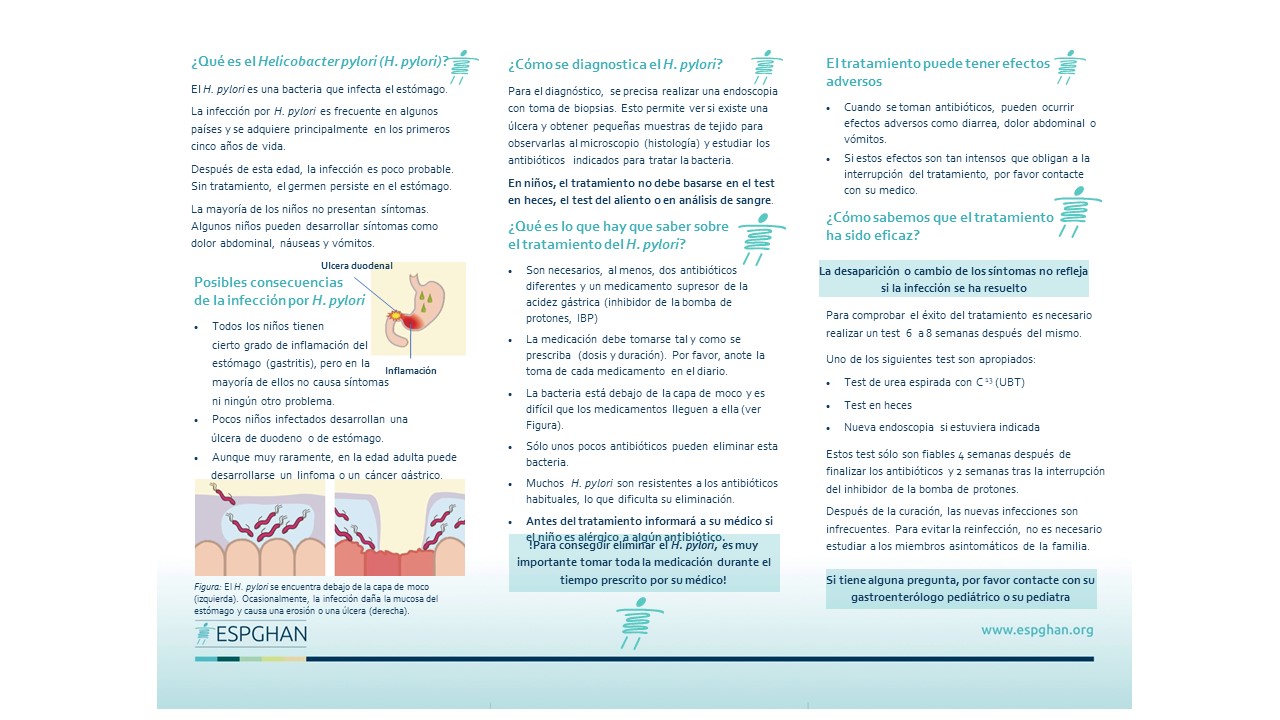

Supplement: mmc1 [file S2341287921001551:mmc1.docx]
